# Supplementary material
Source: MDPI journal article supplement (https://www.mdpi.com/2079-6412/10/12/1186)
Supplement: s1 [file s1]

# Supplementary Materials: Microstructural Analysis and Tribological Behavior of AMDRY 1371 (Mo–NiCrFeBSiC) Atmospheric Plasma Spray Deposited Thin Coatings

**Cornelia Cîrlan Paleu <sup>1</sup>, Corneliu Munteanu <sup>1,\*</sup>, Bogdan Istrate <sup>1</sup>, Shubrajit Bhaumik <sup>3</sup>,  
Petrică Vizureanu <sup>2,\*</sup>, Mădălina Simona Bălțatu <sup>2</sup> and Viorel Paleu <sup>1,\*</sup>**

<sup>1</sup> Department of Mechanical Engineering, Mechatronics and Robotics, Faculty of Mechanical Engineering, Gheorghe Asachi Technical University of Iași, 63 D. Mangeron Blvd., 700050 Iași, Romania; cpaleu@yahoo.com (C.C.P.); bogdan\_istrate1@yahoo.com (B.I.)

<sup>2</sup> Department of Technologies and Equipments for Materials Processing, Faculty of Materials Science and Engineering, Gheorghe Asachi Technical University of Iași, Blvd. No. 51, Mangeron, 700050 Iasi, Romania; cercel.msmona@yahoo.com

<sup>3</sup> Tribology and Surface Interaction Research Laboratory, Department of Mechanical Engineering, SRM Institute of Science and Technology, 603203 Kattankulathur, India; shubrajb@srmist.edu.in

\* Correspondence: corneliu.munteanu@academic.tuiasi.ro (C.M.); peviz@tuiasi.ro (P.V.); vpaleu@tuiasi.ro (V.P.); Tel.: +40-744-793-984 (P.V.)

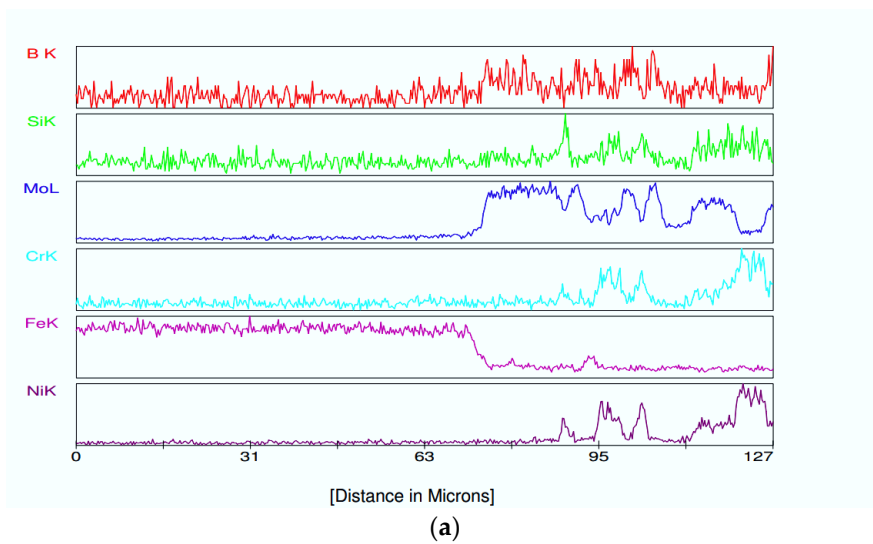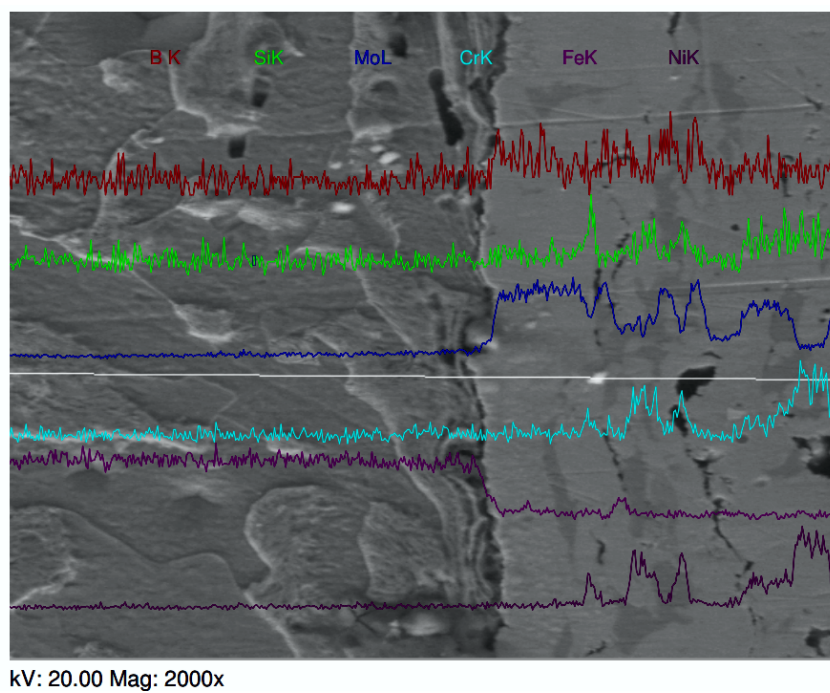

**Figure S1.** Line scan EDS results - Cross section - 5L sample - AMDRY1371. (a) Table of elements; (b) elemental distribution over real surface.

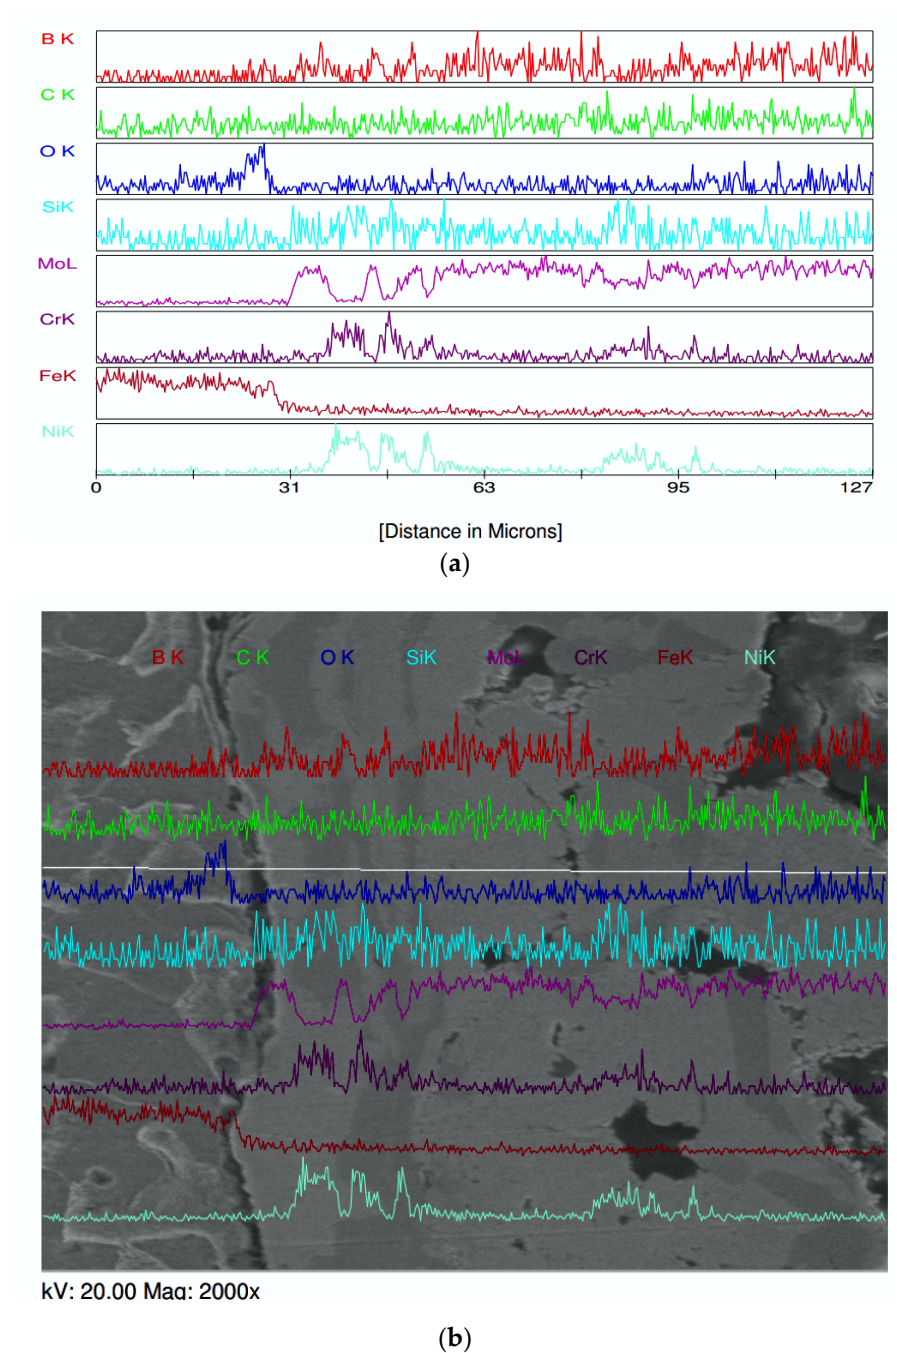

**Figure S2.** Line scan EDS results - Cross section EDS - 7L sample - AMDRY1371. (a) Table of elements; (b) elemental distribution over real surface.

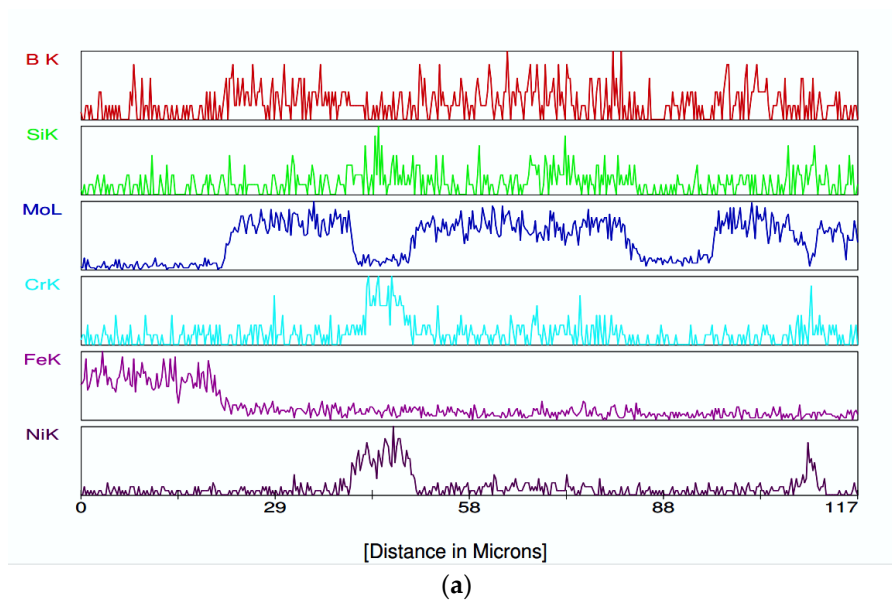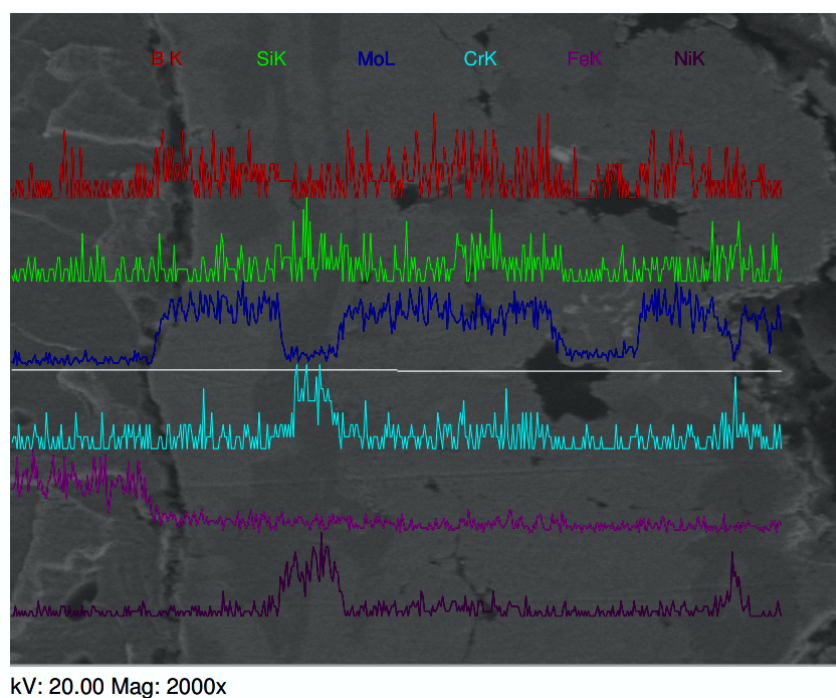

kV: 20.00 Mag: 2000x

**Figure S3.** Line scan EDS results - Cross section EDS - 9L sample - AMDRY1371. (a) Table of elements; (b) elemental distribution over real surface.

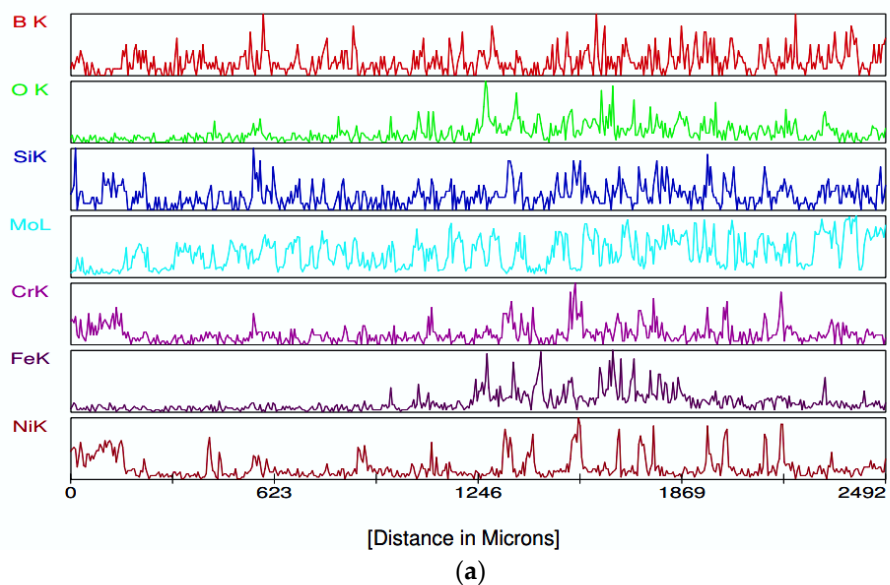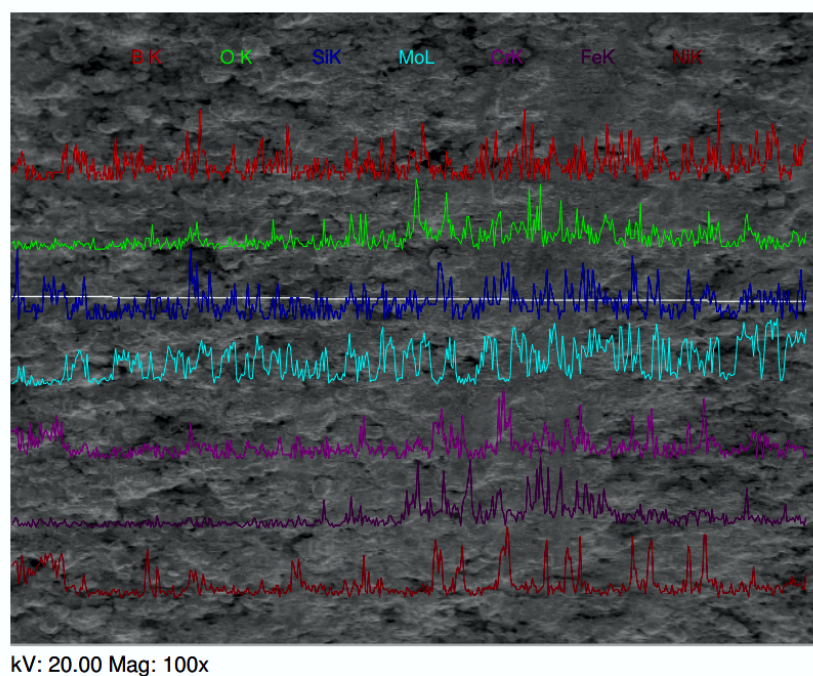

**Figure S4.** Line Scan EDS results over worn surface - 5L sample - AMDRY1371. (a) Table of elements; (b) elemental distribution over real surface.

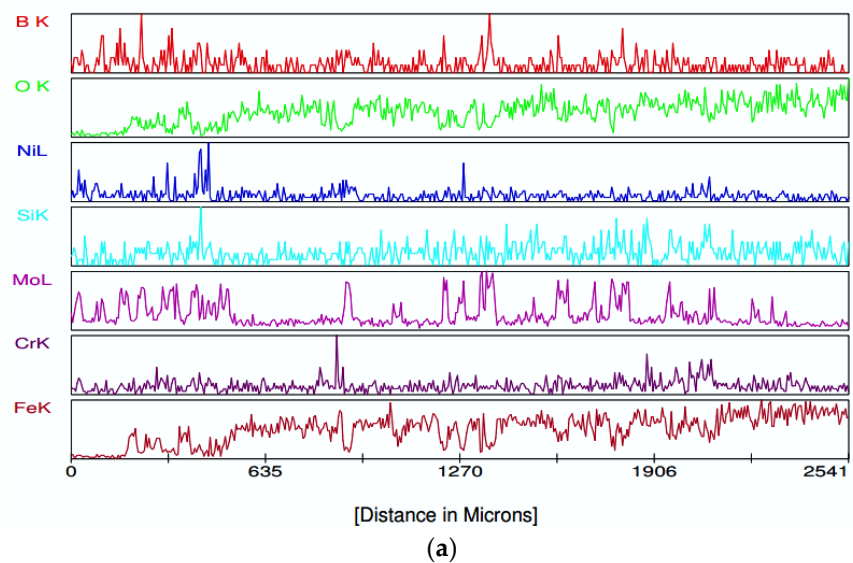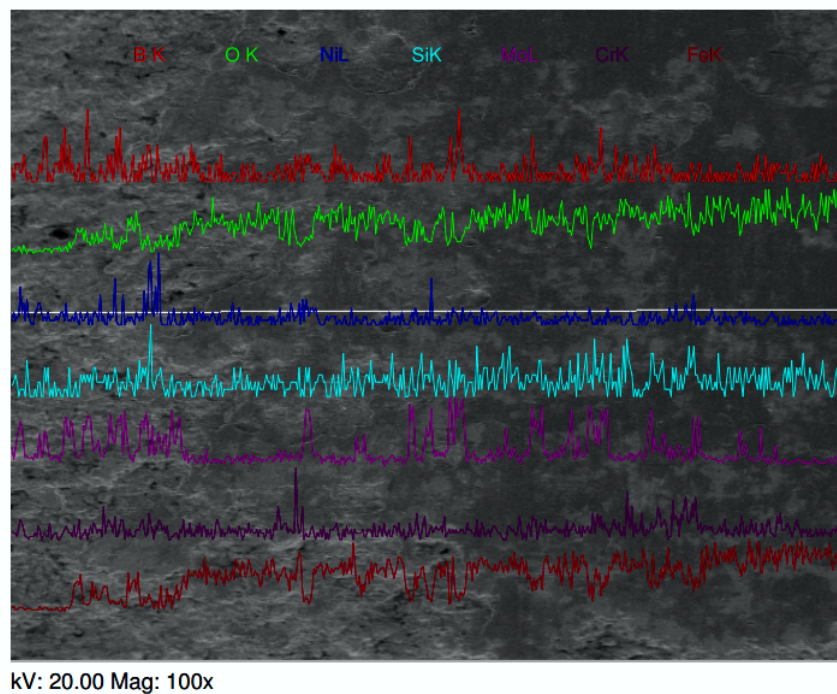

(b)

**Figure S5.** Line Scan EDS results over worn surface - 7L sample - AMDRY1371. (a) Table of elements; (b) elemental distribution over real surface.

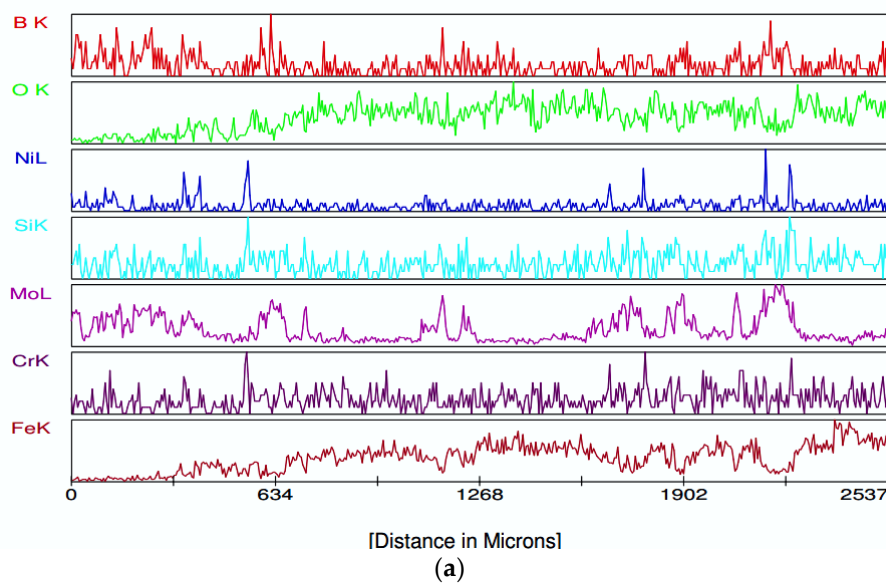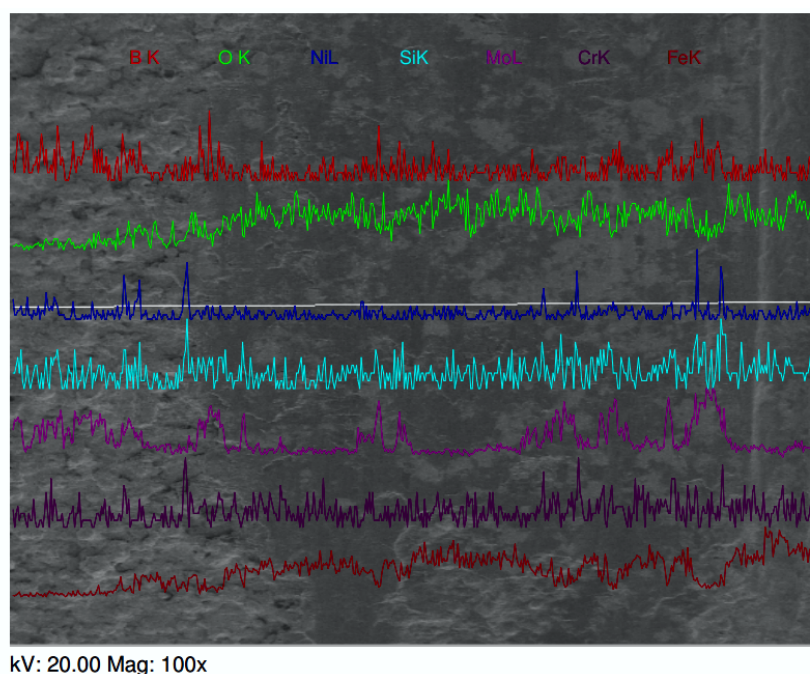

**Figure S6.** Line Scan EDS results over worn surface - 9L sample - AMDRY1371. (a) Table of elements; (b) elemental distribution over real surface.

**Publisher's Note:** MDPI stays neutral with regard to jurisdictional claims in published maps and institutional affiliations.

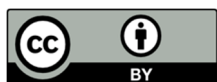

© 2020 by the authors. Submitted for possible open access publication under the terms and conditions of the Creative Commons Attribution (CC BY) license (<http://creativecommons.org/licenses/by/4.0/>).
